# Supplementary material
Source: bioRxiv or medRxiv preprint supplement (https://medrxiv.org/highwire/filestream/98151/field_highwire_adjunct_files/0/2020.09.22.20195628-1.pdf)
Supplement: Supplementary file [file 2020.09.22.20195628-1.pdf]

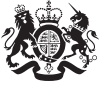

Public Health  
England

# A new infection has been detected in Wuhan, China

(Novel Coronavirus)

If you have been to Wuhan, China, in the last 14 days and develop **ANY** of these symptoms, contact a healthcare professional

**Any of ....**

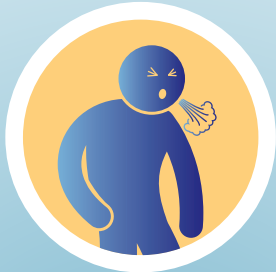

**Cough**

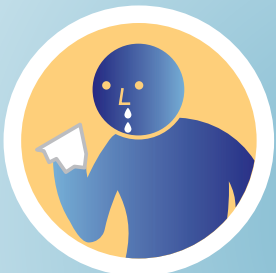

**Runny nose**

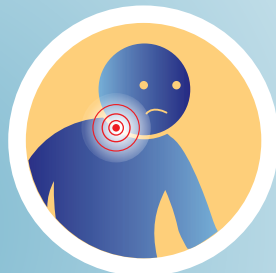

**Sore throat**

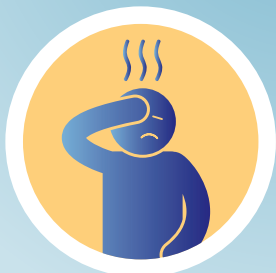

**Fever**

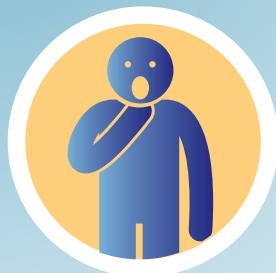

**Difficulty breathing**

If you develop symptoms within 14 days of travel to Wuhan, please stay indoors and avoid contact with others where possible. Ring 111 or call your GP and tell them that you have travelled to Wuhan, for free advice and treatment.
